# Supplementary material
Source: Springer Nature journal article supplement (https://www.springermedizin.de/resource/supplementary/12998_2010_136_MOESM3_ESM.pdf/9623636)
Supplement: MOESM3 [file 9623636]

**Figure 3. Specialty provider distribution by chiropractic user type**

| <i>Specialty</i>                           | Lower Volume Users (N=676) | High Volume Users (N=130) |
|--------------------------------------------|----------------------------|---------------------------|
| Internal Medicine                          | 13.1%                      | 10.6%                     |
| Family Practice                            | 10.3%                      | 9.8%                      |
| Clinical Lab                               | 9.0%                       | 6.3%                      |
| Diagnostic Radiology                       | 8.8%                       | 7.2%                      |
| Cardiology                                 | 7.1%                       | 5.2%                      |
| Ophthalmology                              | 5.6%                       | 4.3%                      |
| Chiropractic                               | 4.1%                       | 21.5%                     |
| <i>Sum of Specialty Percentages Listed</i> | <i>58.1%</i>               | <i>64.9%</i>              |
| <i>Total Claim Volume</i>                  | <i>6,636</i>               | <i>9,080</i>              |

Note: Not all specialty codes are listed so sum of specialties does not add up to 100%.
